# Supplementary material for: Dithymoquinone Analogues as Potential Candidate(s) for Neurological Manifestation Associated with COVID-19: A Therapeutic Strategy for Neuro-COVID
Source: MDPI journal article supplement (doi:10.3390/life12071076), 2022-07-19
Supplement: s1 [file s1]

**Supplementary Table S1:** Interacting amino acids involved in the interaction of DTQ analogues with 3CL<sup>pro</sup>, TLR-4 and PREP. Amino acid(s) involved in hydrogen bonding are represented in bold font.

| Target 1                 | Compound  | Interacting Amino acids                                                                                                                              |
|--------------------------|-----------|------------------------------------------------------------------------------------------------------------------------------------------------------|
| <b>3CL<sup>pro</sup></b> | Comp. (1) | Phe8, Val104, Ile106, <b>Gln110</b> , Thr111, Asn151, Asp153, Ser158, Phe294                                                                         |
|                          | Comp. (2) | Val104, Arg105, Ile106, Gln107, <b>Gln110</b> , Thr111, Asn151, Ser158, Phe294                                                                       |
|                          | Comp. (3) | Phe8, Val104, Arg105, Ile106, Gln107, Gln110, Thr111, Asn151, Asp153, <b>Ser158</b> , Phe294                                                         |
|                          | Comp. (4) | Thr 25, <b>Thr 26</b> , Leu 27, His 41, Leu 141, <b>Asn 142</b> , Gly 143, Cys 145, His 163, His 164, Met 165, <b>Glu 166</b> , Gln 189, Thr 190     |
|                          | Comp. (5) | Val104, Arg105, Ile106, Gln107, <b>Gln110</b> , <b>Thr111</b> , Asn151, Ser158, Phe294                                                               |
|                          | Comp. (6) | Val104, Arg105, Ile106, Gln107, <b>Gln110</b> , Thr111, Asn151, Asp153, Ser158, Phe294                                                               |
|                          | Comp. (7) | Phe8, Val104, Arg105, Ile106, Gln107, Gln110, Thr111, Asp153, <b>Ser158</b> , Phe294                                                                 |
|                          | Comp. (8) | Val104, Arg105, Ile106, <b>Gln107</b> , <b>Gln110</b> , Thr111, Asn151, Ser158, Phe294                                                               |
|                          | Lopinavir | His 41, Met 49, Phe 140, Leu 141, Asn 142, Gly 143, His 163, Met 165, Glu 166, Leu 167, Pro 168, His 172, Arg 188, <b>Gln 189</b> , Thr 190, Gln 192 |
| Target 2                 | Compound  | Interacting Amino acids                                                                                                                              |
| <b>TLR-4</b>             | Comp. (1) | Ser103, Phe104, <b>Arg106</b> , Ala107, Glu111, Thr112, Val113, Asn114, Thr115, His159, <b>Ser184</b> , Leu212, Glu266                               |
|                          | Comp. (2) | Val24, Ile32, Val48, Ile52, Phe76, Leu78, Glu92, Cys133, Val135, Phe151, Ile153                                                                      |
|                          | Comp. (3) | Val24, Ile32, Val48, Ile52, Phe76, Leu78, Glu92, Cys133, Val135                                                                                      |
|                          | Comp. (4) | Ile 32, Ile 44, Ile 46, Ile 52, Leu 54, Leu 61, Ile 63, Leu 78, Phe 126, Tyr 131, <b>Cys 133</b> , Val 135, Phe 147, Leu 149, Phe 151, Ile 153       |
|                          | Comp. (5) | Ile32, Leu54, Ile80, Phe126, Tyr131, Cys133, Phe151, Ile153                                                                                          |
|                          | Comp. (6) | Ile32, Ile52, Leu54, Leu61, Ile80, Cys133, Val135, Phe151, Ile153                                                                                    |
|                          | Comp. (7) | Ile32, Val48, Ile52, Phe76, Leu78, Glu92, Cys133, Val135                                                                                             |
|                          | Comp. (8) | Ile32, Ile52, Leu54, Leu78, Phe121, Cys133, Val135, Phe151, Ile153                                                                                   |

|                 |                 |                                                                                                                                                                                                   |
|-----------------|-----------------|---------------------------------------------------------------------------------------------------------------------------------------------------------------------------------------------------|
|                 | Resatrovid      | Ile 32, Ile 52, Leu 54, Phe 76, Leu 78, Ile 80, Phe 126, Tyr 131, <b>Cys 133</b> , Val 135, Phe 151, Ile 153                                                                                      |
| <b>Target 3</b> | <b>Compound</b> | <b>Interacting Amino acids</b>                                                                                                                                                                    |
| <b>PREP</b>     | Comp. (1)       | Glu169, Arg170, <b>Tyr187, Ser189</b> , Tyr211, <b>Gln219</b>                                                                                                                                     |
|                 | Comp. (2)       | Met67, Tyr71, Tyr484, Ser485, <b>Ser487, Arg488</b> , Gln577, Val689, Glu692, Val693                                                                                                              |
|                 | Comp. (3)       | Phe173, Ser174, Cys175, Asn188, Gln208, Met235, Gly237, Ala238, Ser250, Arg252                                                                                                                    |
|                 | Comp. (4)       | Phe 173, Ser 174, Cys 175, Met 235, <b>Gly 237</b> , Arg 252, Gly 254, Cys 255, Tyr 473, Phe 476, Ser 554, <b>Asn 555</b> , Val 580, Ile 591, Ala 594, <b>Trp 595, Tyr 599</b> , Arg 643, Val 644 |
|                 | Comp. (5)       | Tyr484, Ser485, Ser487, <b>Arg488, Gln577</b> , His680, Lys684, Val689, Glu692, Val693                                                                                                            |
|                 | Comp. (6)       | Met67, Tyr71, Tyr471, Tyr484, Ser485, Val486, <b>Ser487, Arg488</b> , Gln577, Val689, Glu692, Val693                                                                                              |
|                 | Comp. (7)       | Phe173, Cys175, Asn188, Met235, Gly237, Ala238, Ser250, Arg252                                                                                                                                    |
|                 | Comp. (8)       | <b>Pro34</b> , Asp35, Thr39, Lys40, Val43, Glu44, Asn47, Thr200, Asp639, Val674, Thr676                                                                                                           |
|                 | Berberine       | Phe 173, Ser 174, Cys 175, Met 235, <b>Gly 237, Ser 250</b> , Arg 252, <b>Cys 255</b> , Ile 591, Ala 594, Trp 595, Arg 643                                                                        |
